# Supplementary material
Source: PubMed Central journal article supplement (PMC8120253)
Supplement: 247_2021_5088_MOESM1_ESM.pdf [file 247_2021_5088_MOESM1_ESM.pdf]

## Demographics

1. What is your gender?

- Female
- Male
- Other

\* 2. What is your age (in years)?

\* 3. How many years have you been in practice post training?

\* 4. What FTE is your position? Please answer based on your FTE prior to any changes that occurred after the onset of the COVID-19 pandemic (decimal form, 0-1.0)

\* 5. What is your practice type?

- Free standing children's hospital
- Children's hospital/division/department as part of a larger institution
- Non-hospital based practice which has a pediatric population (private practice)
- Primarily adult academic hospital which has a pediatric patient population (hybrid primarily academic)
- Primarily adult private practice which has a pediatric patient population (hybrid primarily private)
- Teleradiology
- Other (please specify)

6. How many pediatric radiology FTE are there in your practice? For example, in a practice of 5 pediatric radiologists- 3 full time and 2 part-time (0.6 FTE each), the total FTE is 4.2.

\* 7. What state(s) do you practice in?

## Working Remotely

8. Are you able to read clinical cases remotely via workstation, laptop, or other access to PACS?

Yes

No

---

9. Are you reading clinical cases remotely from home?

Yes

No

10. Where are you reading remotely from? (check all that apply)

- Work office
- Other remote site on hospital property
- Other remote site set up by the department
- Other (please specify)



11. Did you have home reading capability prior to mandated social distancing guidelines (March 2020)?

Yes

No

12. Are you using the home reading capability more than prior to mandated social distancing guidelines (March 2020)?

Yes

No

13. After mandated social distancing had been put in place, do you perform clinical, administrative, and/or academic work remotely at home more than previously?

Yes

No



15. Regarding IT support for working remotely at home, how much do you agree with the following statements?

Strongly Disagree      Disagree      Neutral      Agree      Strongly Agree      N/A

I have adequate and readily accessible IT support for reading cases remotely from home.

                            

I have adequate and readily accessible IT support for virtual communication with clinicians and other hospital staff while remotely working from home.

## Personal Protective Equipment (PPE)

**PPE refers to surgical masks, N-95 masks, powered air-purifying respirators (PAPR), gloves, gowns, and face shield/protective eyewear.**

16. Do you feel you have adequate PPE available daily relative to your risk level?

Yes

No



17. Which PPE do you feel is lacking? (Check all that apply)

- |                                                                   |                                                         |
|-------------------------------------------------------------------|---------------------------------------------------------|
| <input type="checkbox"/> Surgical masks                           | <input type="checkbox"/> Gloves                         |
| <input type="checkbox"/> N-95 masks                               | <input type="checkbox"/> Gowns                          |
| <input type="checkbox"/> Powered air-purifying respirators (PAPR) | <input type="checkbox"/> Face shield/protective eyewear |
| <input type="checkbox"/> Other (please specify)                   |                                                         |

18. Do you feel you had appropriate direction from the department/institution on how and when to use PPE?

- Yes
- No

If No, please give comments on why you chose this answer?

19. I believe that the PPE guidelines put in place by my department were appropriate for the risk exposure of the members.

Not stringent enough

Appropriate

Too stringent

20. On a daily basis, I feel I have adequate guidance on appropriate department protocols regarding interaction with patients under investigation (PUI) or COVID positive to feel protected while working in the pediatric radiology department.

Strongly Disagree

Disagree

Neutral

Agree

Strongly Agree

## Redeployment

**Redeployment refers to doing work-related tasks outside those as part of one's normal job.**

21. Were you asked to consider redeploying to do other tasks in your hospital?

Yes

No

---

22. Have you been redeployed to do other tasks?

Yes

No



23. Was it voluntary to be redeployed?

Yes

No

24. Do you feel you received appropriate training for the new redeployment tasks?

Yes

No

25. If you were asked to redeploy to do other tasks in the hospital, would you do it?

Yes

No

Depends (please specify)



Strongly Disagree      Disagree      Neutral      Agree      Strongly Agree      N/A

I have regular virtual communication (outside of work-related activities) with my pediatric radiology colleagues in my department since mandated social distancing guidelines were implemented.

                            

Trying to balance the demands of my work with the time needed for my personal and family life is a major source of stress in my life currently.

                            

Providing, organizing, or paying for care for dependents (e.g. children, elderly family members) is a major source of stress in my life currently.

## Department Wellness Initiatives

27. How often do the following statements refer to how you feel since the imposed new challenges related to COVID-19 pandemic?

Never

Rarely

Sometimes

Frequently

Always

My department has provided adequate access to wellness resources for the department members.

The leadership in my department has been effective in providing regular communication to the staff regarding updates since the onset of the COVID-19 pandemic.

I can comfortably contact leaders and supervisors in my department with concerns, questions and anxieties.



## Financial Concerns

28. How often do the following statements refer to you since the onset of the COVID-19 pandemic and mandated social distancing was implemented?

|                                                           | Never                 | Rarely                | Sometimes             | Frequently            | Always                |
|-----------------------------------------------------------|-----------------------|-----------------------|-----------------------|-----------------------|-----------------------|
| I have concerns about my current financial situation.     | <input type="radio"/> |
| I may have difficulties meeting my financial obligations. | <input type="radio"/> |
| I fear taking a substantial reduction in pay.             | <input type="radio"/> |
| I fear losing my job.                                     | <input type="radio"/> |

29. Were you asked to change your current FTE status since mandated social distancing guidelines were implemented (mandatory furlough would be considered a decrease in FTE status)?

- Increase
- Decrease
- No change

30. Since the onset of the new challenges associated with the COVID-19 pandemic, how often do you feel the following: "I wish I was in a different career outside of medicine."

| Never                 | Rarely                | Sometimes             | Frequently            | Always                |
|-----------------------|-----------------------|-----------------------|-----------------------|-----------------------|
| <input type="radio"/> |

31. Please share any additional comments regarding the topics of this survey. Thank you for participating.
